# Supplementary material for: Little White Lies: Pericarp Color Provides Insights into the Origins and Evolution of Southeast Asian Weedy Rice
Source: PubMed Central journal article supplement (PMC5144979; doi:10.1534/g3.116.035881), 2016-10-10
Supplement: supp_g3.116.035881_FigureS1.pdf [file supp_g3.116.035881_FigureS1.pdf]

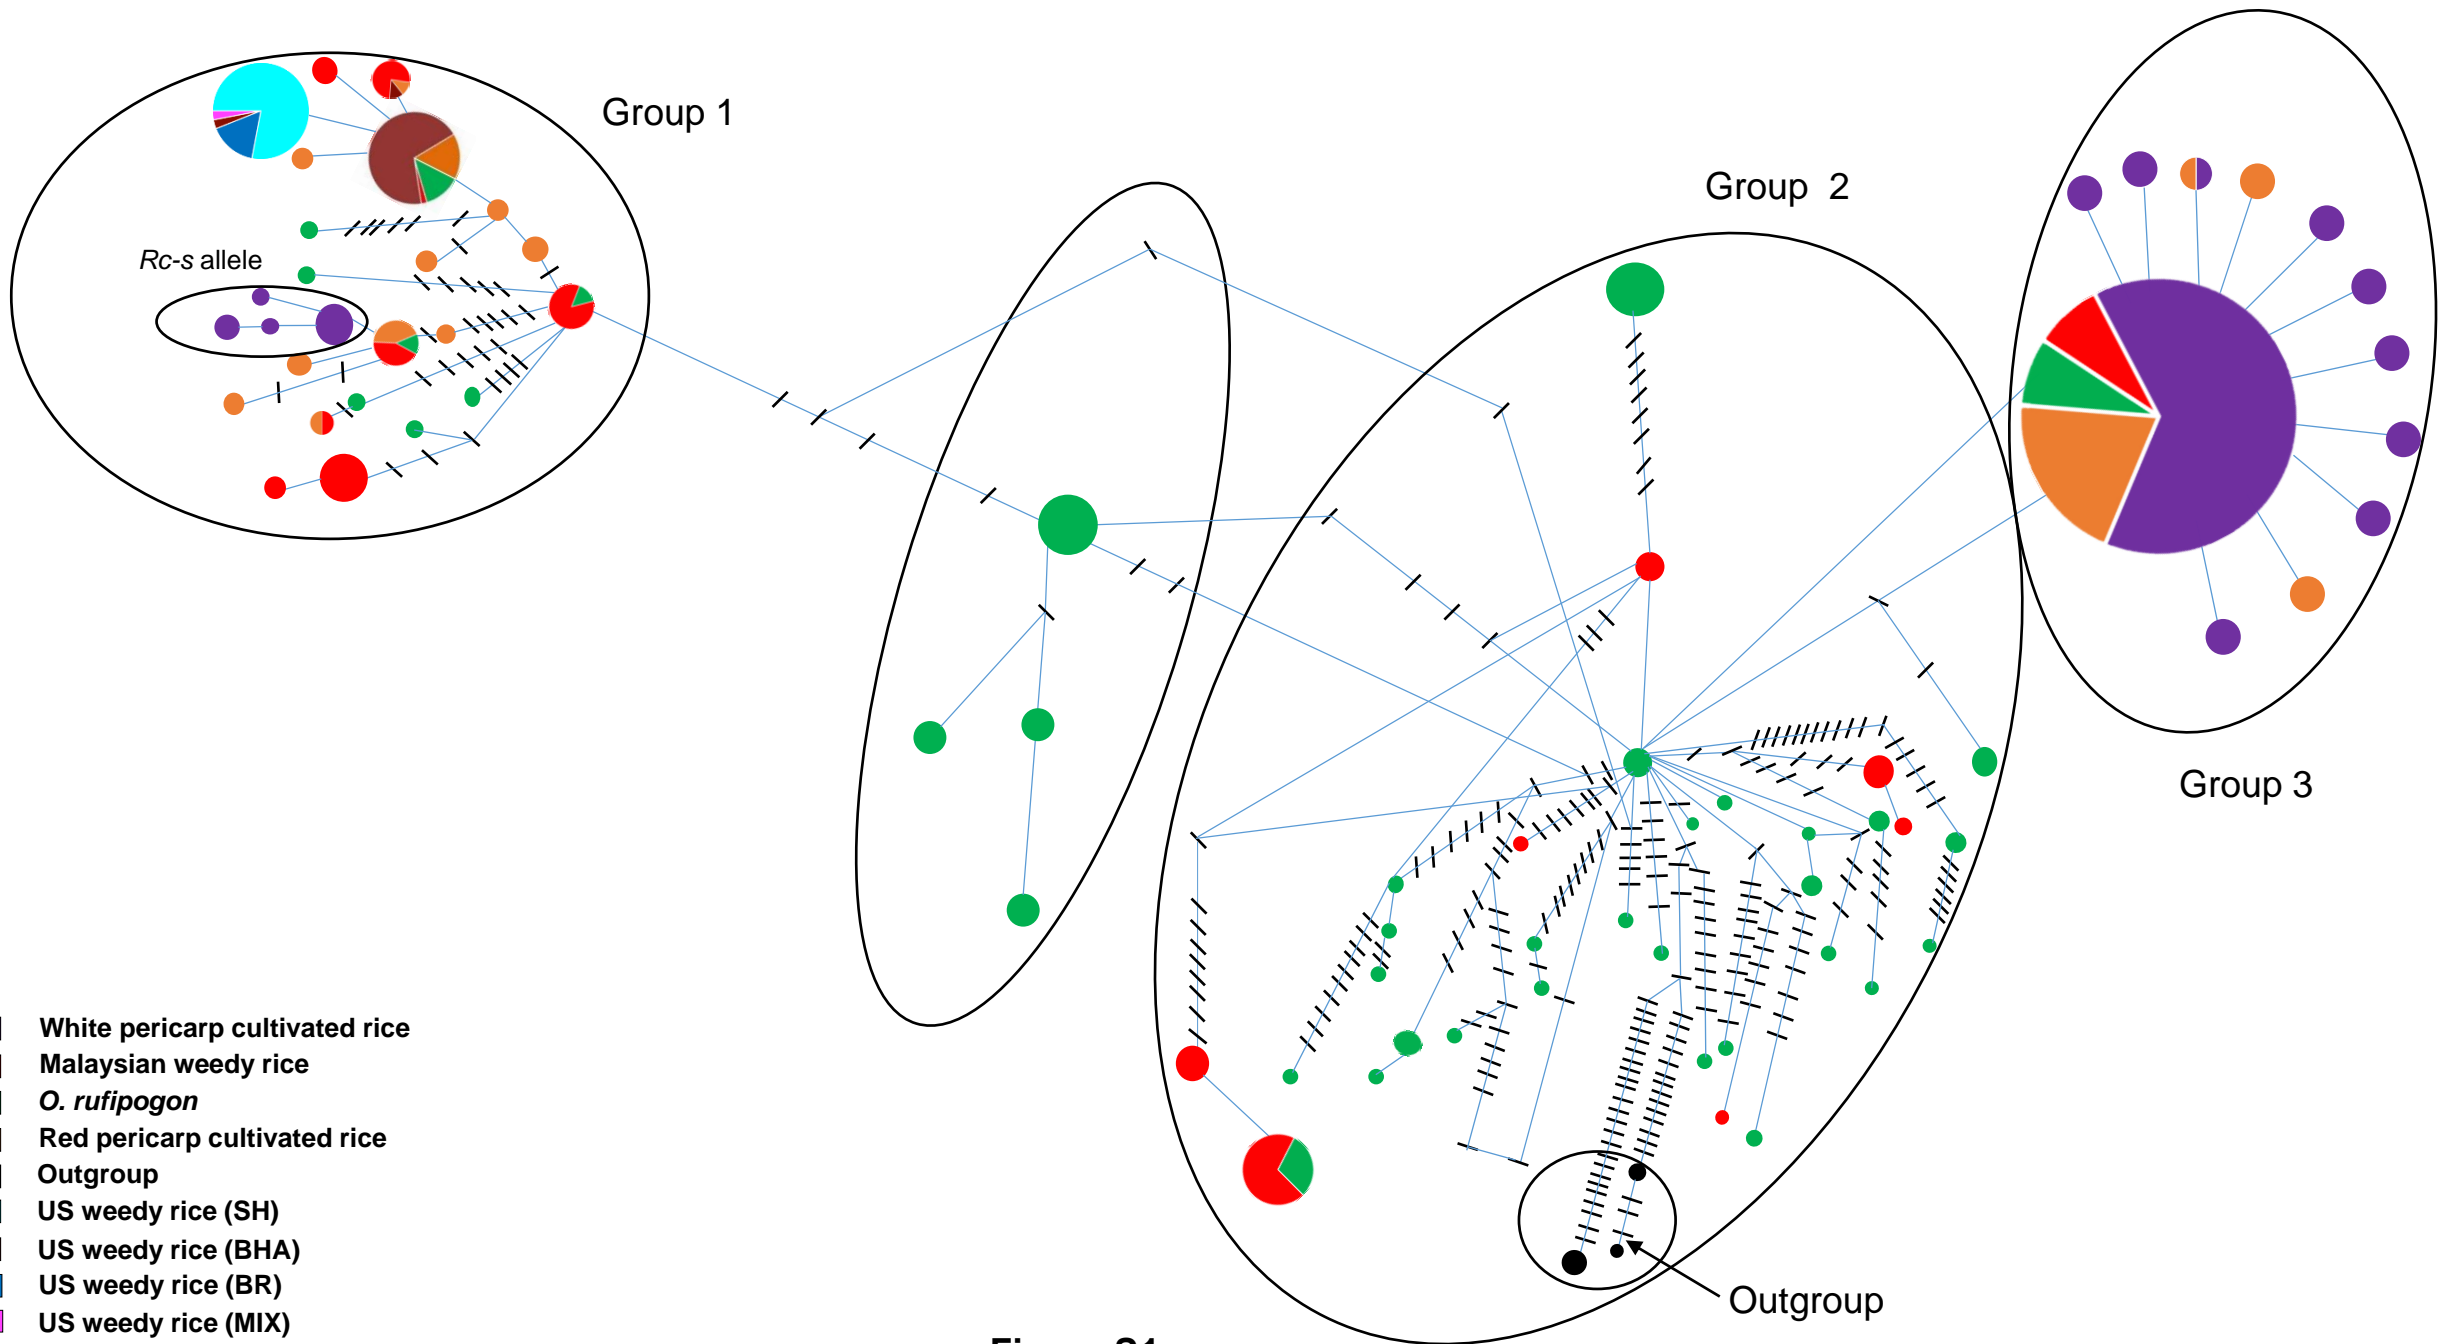

**Figure S1**
